# Supplementary material for: Magnetic conjugated microporous polymer hollow spheres decorated with Fe3O4 nanoparticles for selective absorption and sterilization
Source: Royal Society of Chemistry journal article supplement (doi:10.1039/d1en01076j), 2022-01-01
Supplement: d1en01076j1.pdf [file d1en01076j1.pdf]

## Supplementary Information

**Magnetic conjugated microporous polymer hollow spheres decorated with Fe<sub>3</sub>O<sub>4</sub> nanoparticles for selective absorption and sterilization**

*Zhentao Hu,<sup>a</sup> Yingjiao Ma,<sup>a</sup> Nan Lu,<sup>a</sup> Lijuan Yan,<sup>a</sup> Hanxue Sun,<sup>a</sup> Zhaoqi Zhu,<sup>a</sup> Weidong Liang,<sup>a</sup> An Li<sup>\*a</sup>*

College of Petrochemical Technology, Lanzhou University of Technology, Langongping Road 287,  
Lanzhou 730050, P. R. China

\*Corresponding author: Prof. An Li, Tel.: +86-931-7823125. Fax: +86-931-7823125.

E-mail address: [lian2010@lut.cn](mailto:lian2010@lut.cn) (A. Li)

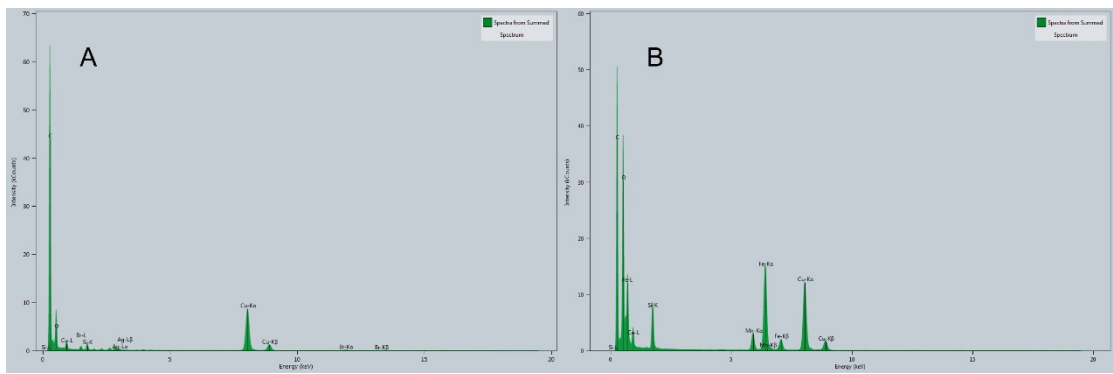

Figure 1 (A) EDS photographs of distribution of elements for C and Si on the surface of CMP-1. (B) EDS photographs of distribution of elements for C, Si and Fe on the surface of CMP-2.

Table 1 fitting result of Langmuir

| Sample                               | antibiotic | equation of regression | R <sup>2</sup> | q <sub>max</sub> (mg g <sup>-1</sup> ) | b <sub>L</sub> (L mg <sup>-1</sup> ) |
|--------------------------------------|------------|------------------------|----------------|----------------------------------------|--------------------------------------|
| CMP-1@Fe <sub>3</sub> O <sub>4</sub> | OFL        | Y=0.00565X+0.41589     | 0.9979         | 176.99                                 | 0.01358                              |
| CMP-2@Fe <sub>3</sub> O <sub>4</sub> | OFL        | Y=0.00545X+0.35321     | 0.9996         | 183.48                                 | 0.01543                              |
| CMP-1@Fe <sub>3</sub> O <sub>4</sub> | DIF        | Y=0.00490X+0.12375     | 0.9993         | 204.08                                 | 0.03959                              |
| CMP-2@Fe <sub>3</sub> O <sub>4</sub> | DIF        | Y=0.00504X+0.14804     | 0.9978         | 198.41                                 | 0.03405                              |

Table 2 fitting result of Freundlich

| Sample                               | antibiotic | equation of regression | R <sup>2</sup> | k <sub>F</sub> | 1/n     |
|--------------------------------------|------------|------------------------|----------------|----------------|---------|
| CMP-1@Fe <sub>3</sub> O <sub>4</sub> | OFL        | Y=0.36682X+3.32929     | 0.9381         | 27.91          | 0.36682 |
| CMP-2@Fe <sub>3</sub> O <sub>4</sub> | OFL        | Y=0.41878X+3.01862     | 0.9666         | 20.46          | 0.41878 |
| CMP-1@Fe <sub>3</sub> O <sub>4</sub> | DIF        | Y=0.39839X+2.45186     | 0.9597         | 11.60          | 0.39839 |
| CMP-2@Fe <sub>3</sub> O <sub>4</sub> | DIF        | Y=0.47331X+2.43296     | 0.9539         | 11.39          | 0.47331 |
